# Supplementary material for: Association of the Built Environment With Childhood Psychosocial Stress
Source: PubMed Central journal article supplement (PMC7578768; doi:10.1001/jamanetworkopen.2020.17634), 2020-10-21
Supplement: jamanetwopen-e2017634-s001.pdf [file jamanetwopen-e2017634-s001.pdf]

## Supplementary Online Content

Franklin M, Yin X, McConnell R, Fruin S. Association of the built environment with childhood psychosocial stress. *JAMA Netw Open*. 2020;3(10):e2017634. doi:10.1001/jamanetworkopen.2020.17634

**eTable 1.** Spearman Correlations Between Environmental Factors at Residences of Study Participants

**eTable 2.** Estimated Associations Between PSS-4 and Environmental Factors From the Multipollutant Model Including Regional PM<sub>2.5</sub>

**eTable 3.** Estimated Associations Between Stress and Environmental Factors From the Multi-Exposure Model Including Sleep Duration

**eFigure.** Boxplots of Environmental Factors, Outcome and Modifier by Community

This supplementary material has been provided by the authors to give readers additional information about their work.

**eTable 1. Spearman correlations between environmental factors at residences of study participants.**

|                                         | Freeway NRP | Non-Freeway NRP | Total NRP | Regional PM <sub>2.5</sub> | Noise | NDVI  | EVI   | ALAN VIIRS | ALAN World Atlas |
|-----------------------------------------|-------------|-----------------|-----------|----------------------------|-------|-------|-------|------------|------------------|
| Freeway NRP <sup>a</sup>                | 1           | 0.44            | 0.96      | 0.19                       | 0.60  | -0.52 | -0.53 | 0.58       | 0.59             |
| Non-Freeway NRP <sup>a</sup>            |             | 1               | 0.65      | -0.03                      | 0.45  | -0.46 | -0.52 | 0.70       | 0.57             |
| Total NRP <sup>a</sup>                  |             |                 | 1         | 0.15                       | 0.66  | -0.57 | -0.59 | 0.68       | 0.64             |
| Regional PM <sub>2.5</sub> <sup>b</sup> |             |                 |           | 1                          | -0.16 | -0.31 | -0.11 | 0.01       | 0.40             |
| Noise                                   |             |                 |           |                            | 1     | -0.29 | -0.39 | 0.49       | 0.21             |
| NDVI <sup>c</sup>                       |             |                 |           |                            |       | 1     | 0.95  | -0.66      | -0.66            |
| EVI <sup>d</sup>                        |             |                 |           |                            |       |       | 1     | -0.72      | -0.72            |
| ALAN VIIRS <sup>e</sup>                 |             |                 |           |                            |       |       |       | 1          | 0.71             |
| ALAN World Atlas <sup>f</sup>           |             |                 |           |                            |       |       |       |            | 1                |

<sup>a</sup> near-roadway pollution, nitrogen oxides (NOx); <sup>b</sup> particulate matter with aerodynamic diameter < 2.5µm; <sup>c</sup> Normalized Difference Vegetation Index; <sup>d</sup> Enhanced Vegetation Index; <sup>e</sup> Artificial light at night from the Visible Infrared Imaging Radiometer Suite; <sup>f</sup> Artificial light at night from the World Atlas of Artificial Night Light

**eTable 2. Estimated associations between PSS-4 and environmental factors from the multipollutant model including regional PM<sub>2.5</sub>**

| <b>Environmental Factor</b>                                            | <b>Effect Estimate (95% CI)<sup>a</sup></b> |
|------------------------------------------------------------------------|---------------------------------------------|
| Exposure to Secondhand Smoke                                           | 0.85 (0.46, 1.24) <sup>b</sup>              |
| ALANc, World Atlas (piecewise linear)<br>(0 – 3.3 mcd/m <sup>2</sup> ) | 0.78 (0.04, 1.53) <sup>b</sup>              |
| Total NRP <sup>d</sup> deviation from mean (ppb)                       | 0.11 (0.01, 0.21) <sup>b</sup>              |
| Regional PM <sub>2.5</sub> <sup>e</sup> (ug/m <sup>3</sup> )           | 0.06 (-0.16, 0.28)                          |
| EV <sup>f</sup>                                                        | -0.24 (-0.45, -0.04) <sup>b</sup>           |
| Noise (dB)                                                             | -0.12 (-0.31, 0.08)                         |

<sup>a</sup> All models adjusted for race, ethnicity, body mass index, height, community; effect estimates are scaled by the IQR; <sup>b</sup> p<0.05; <sup>c</sup> Artificial light at night; <sup>d</sup> near-roadway pollution; <sup>e</sup> particulate matter with aerodynamic diameter < 2.5um; <sup>f</sup> Enhanced Vegetation Index

**eTable 3. Estimated associations between stress and environmental factors from the multi-exposure model including sleep duration**

| Environmental Factor                                                                | Effect Estimate (95% CI) <sup>a</sup> |
|-------------------------------------------------------------------------------------|---------------------------------------|
| Exposure to Secondhand Smoke                                                        | 0.79 (0.40, 1.18) <sup>a</sup>        |
| ALAN <sup>c</sup> , World Atlas (piecewise linear)<br>(0 – 4.9 mcd/m <sup>2</sup> ) | 0.47 (0.00, 0.99) <sup>a</sup>        |
| Total NRP <sup>d</sup> (ppb)                                                        | 0.16 (0.03, 0.30) <sup>a</sup>        |
| EVI <sup>e</sup>                                                                    | -0.20 (-0.40, 0.00) <sup>a</sup>      |
| Noise (db)                                                                          | -0.10 (-0.30, 0.09)                   |
| Sleep Duration (>8hrs)                                                              | -0.99 (-1.23, -0.75) <sup>a</sup>     |

<sup>a</sup> All models adjusted for race, ethnicity, body mass index, height, community; effect estimates are scaled by the IQR; <sup>b</sup> p<0.05; <sup>c</sup> Artificial light at night; <sup>d</sup> near-roadway pollution; <sup>e</sup> Enhanced Vegetation Index

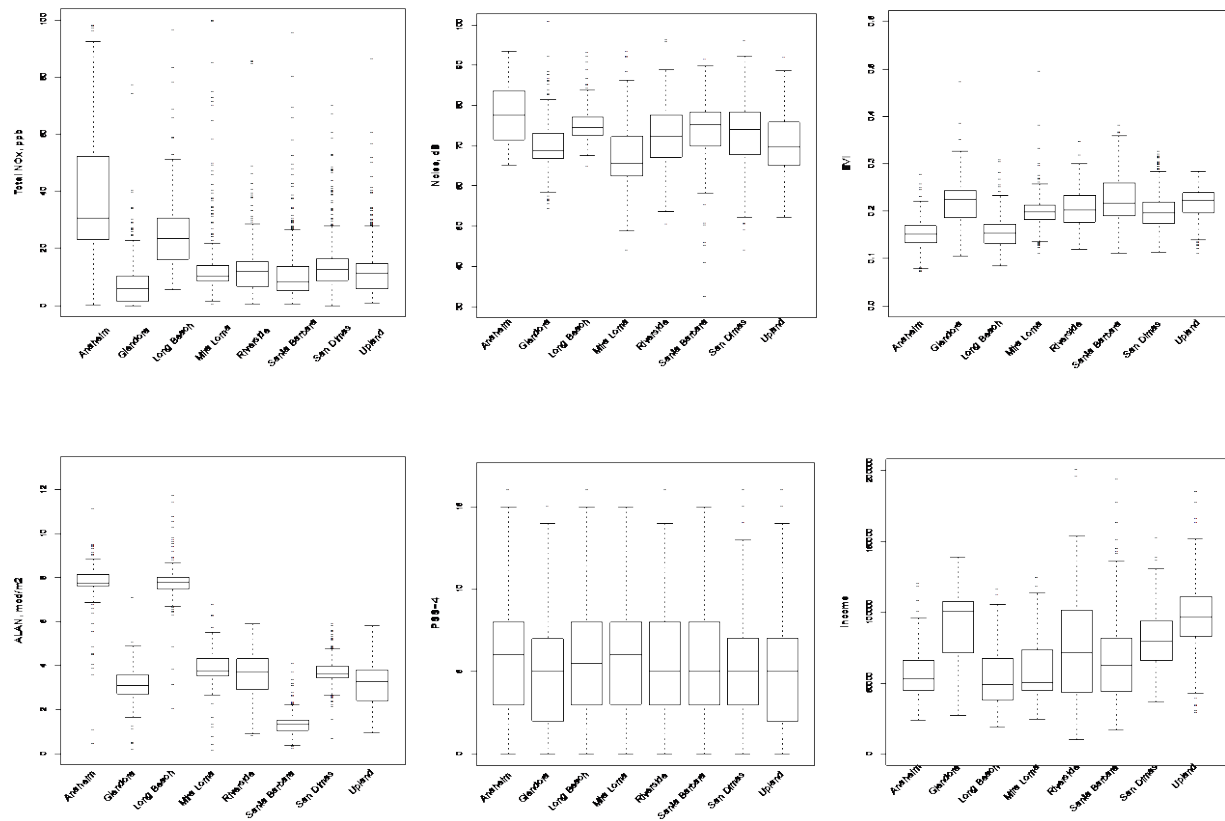

**eFigure. Boxplots of environmental factors, outcome and modifier by community (Top left to bottom right: near-roadway air pollution (NO<sub>x</sub>, ppb), noise (L<sub>dn</sub>, dB), enhanced vegetation index (EVI), artificial light at night (ALAN) from World Atlas (mcd/m<sup>2</sup>), perceived stress (PSS-4), Median Household Income.**
